# Supplementary material
Source: ML conference proceedings conference paper supplement (https://openreview.net/forum?id=w1TjXJk846)

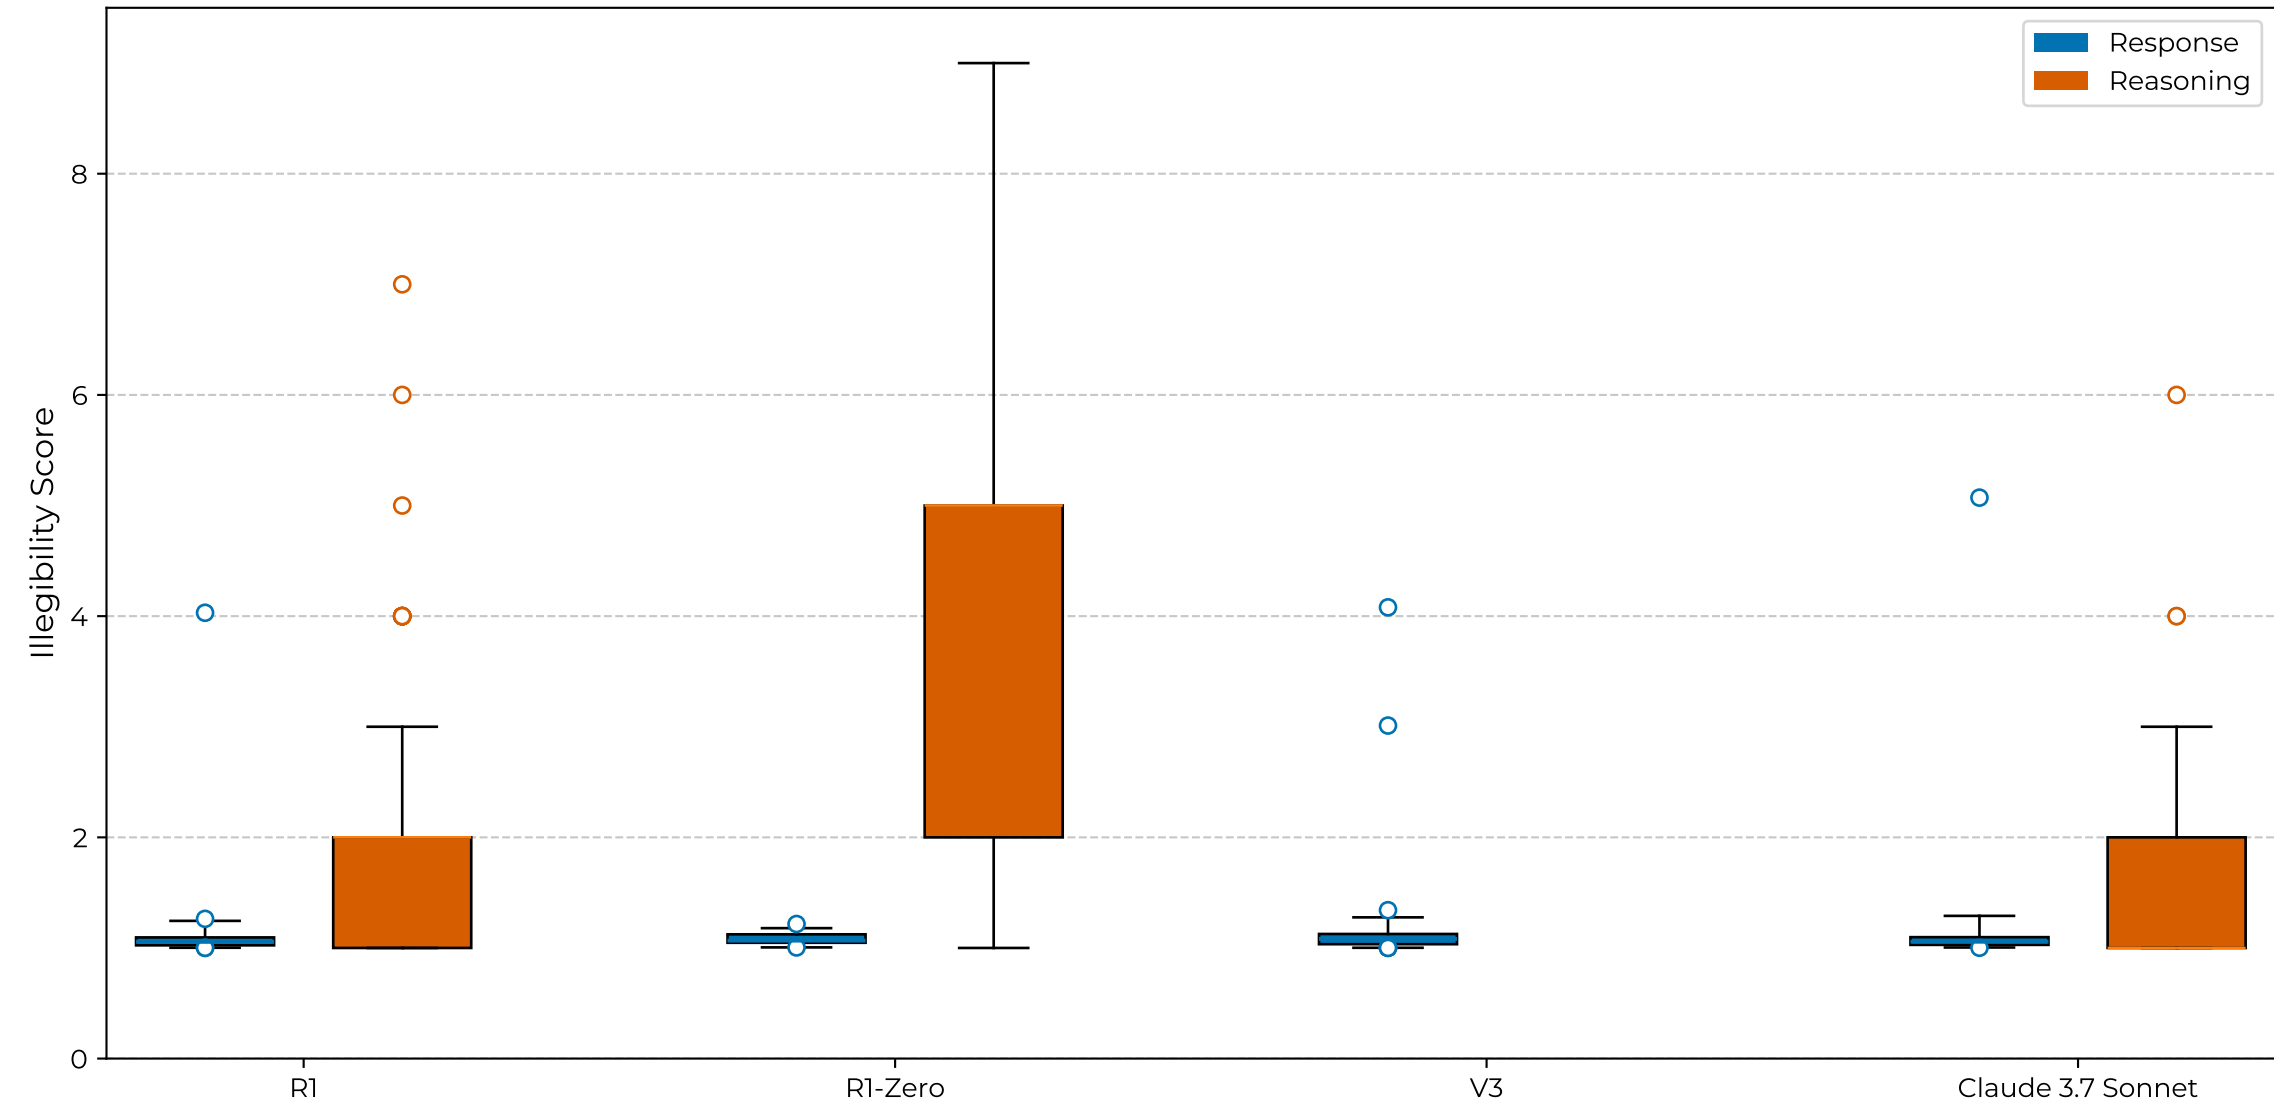

Supplement: supplementary_material [file Legibility Comparison.pdf › cot_faithfulness-main/tests/Legibility Comparison.pdf]

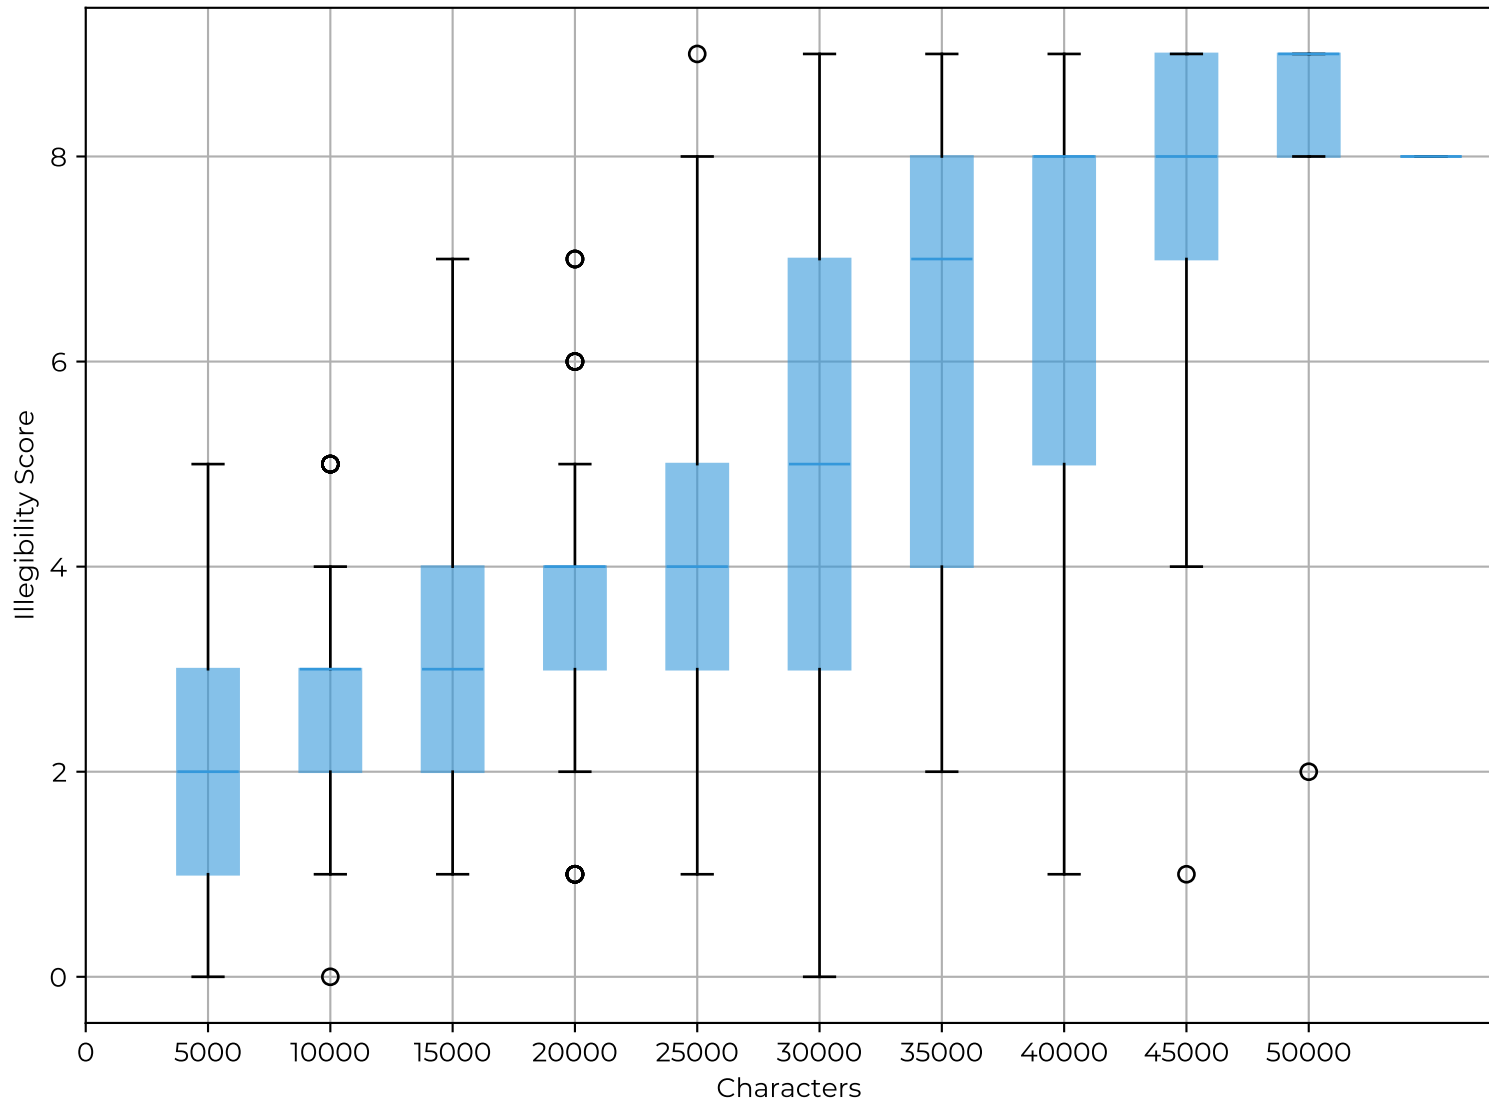

Supplement: supplementary_material [file comparison.pdf › cot_faithfulness-main/tests/comparison.pdf]

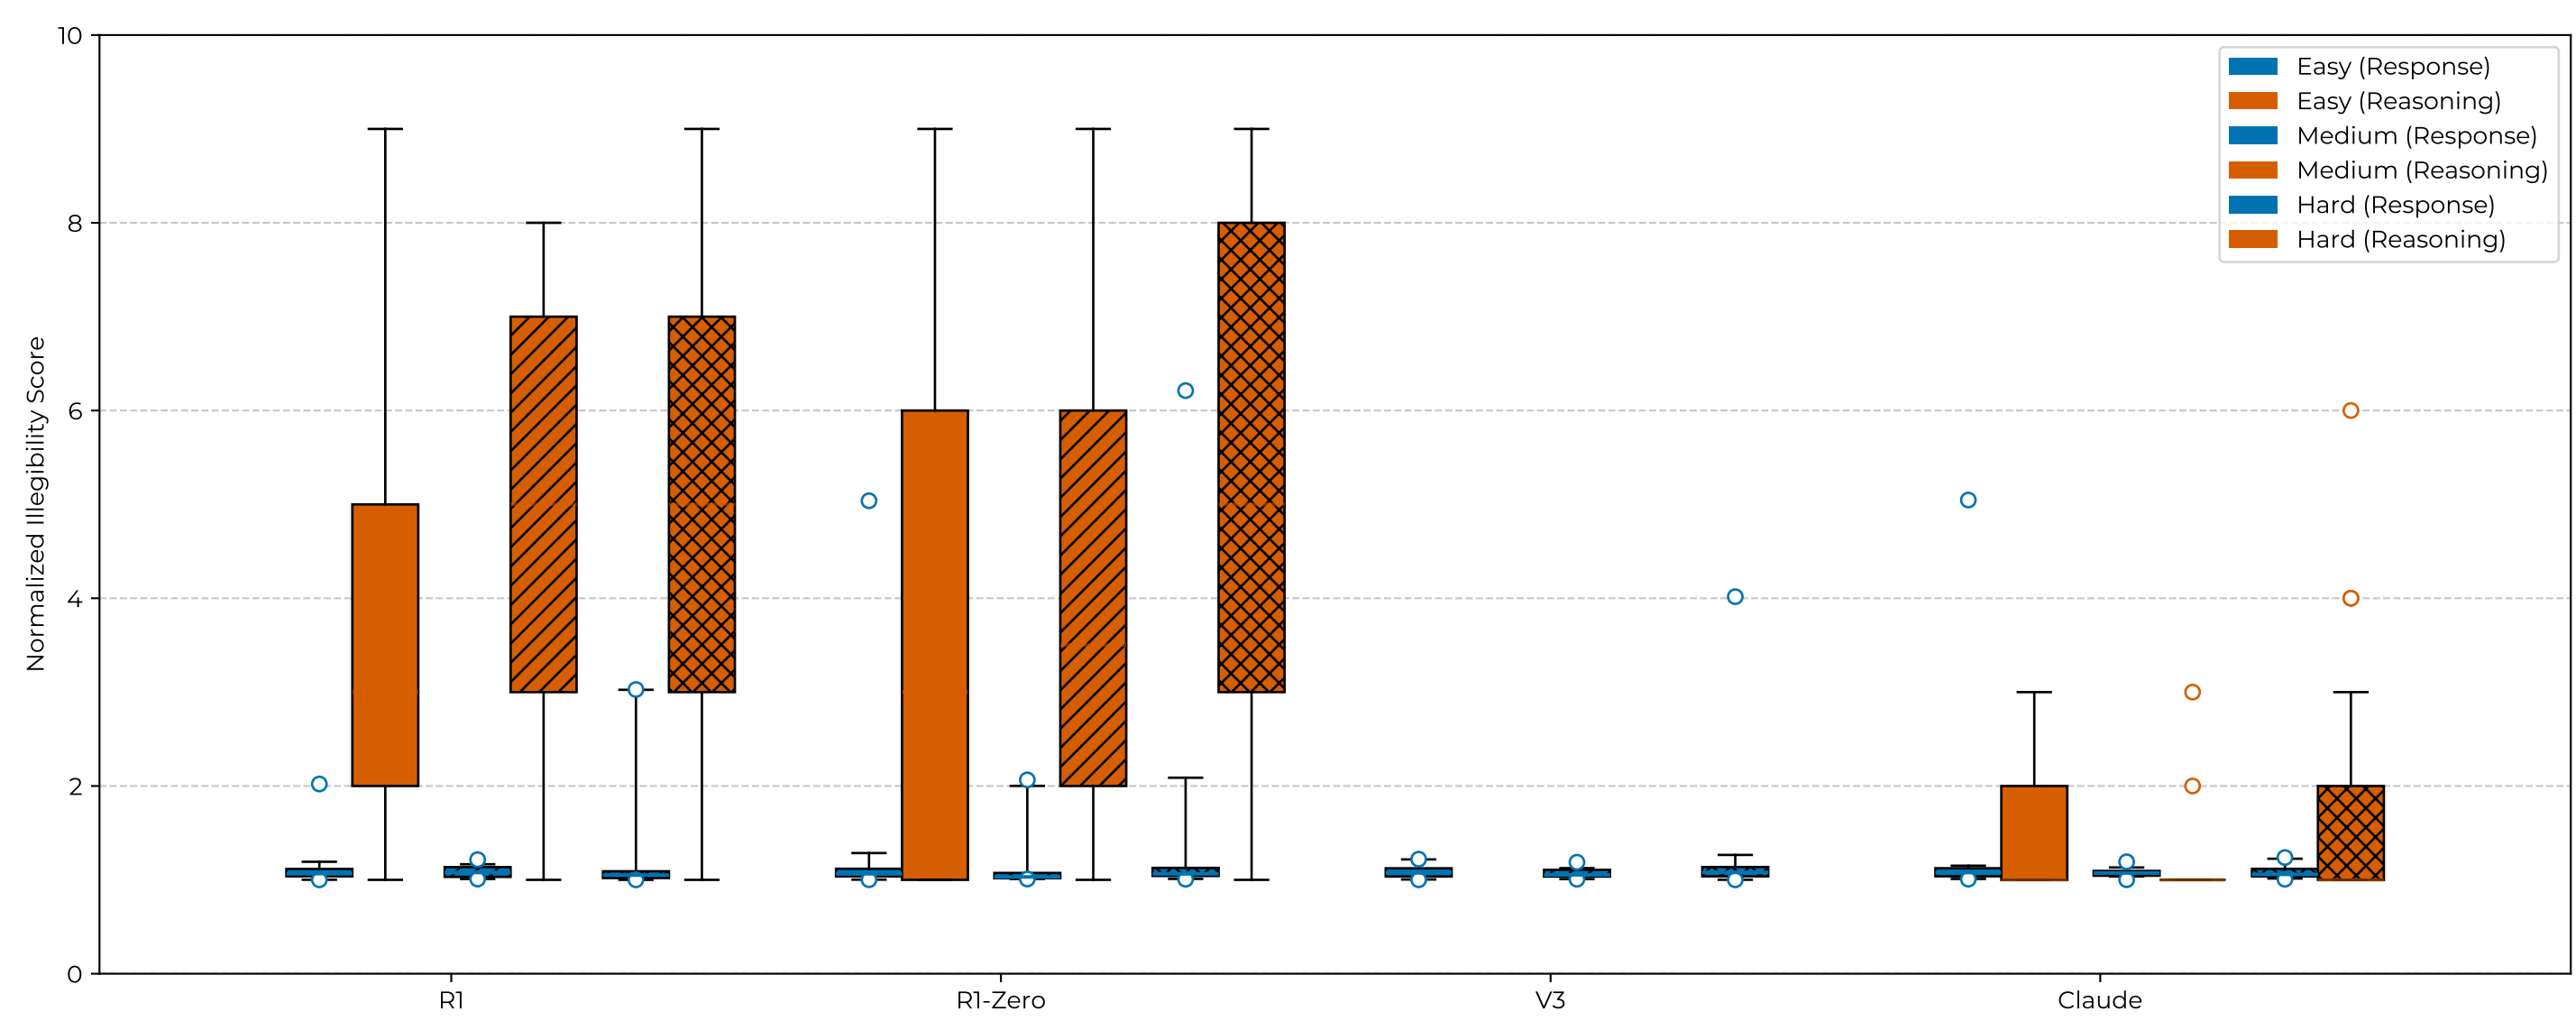

Supplement: supplementary_material [file legibility_by_baseline_correctness_different_models_boxplot_temp_new.pdf › cot_faithfulness-main/tests/legibility_by_baseline_correctness_different_models_boxplot_temp_new.pdf]

Normalized Illegibility Score (higher means less legible)

0

2

4

6

8

Incorrect

Correct

Point density

3.5

3.0

2.5

2.0

1.5

1.0

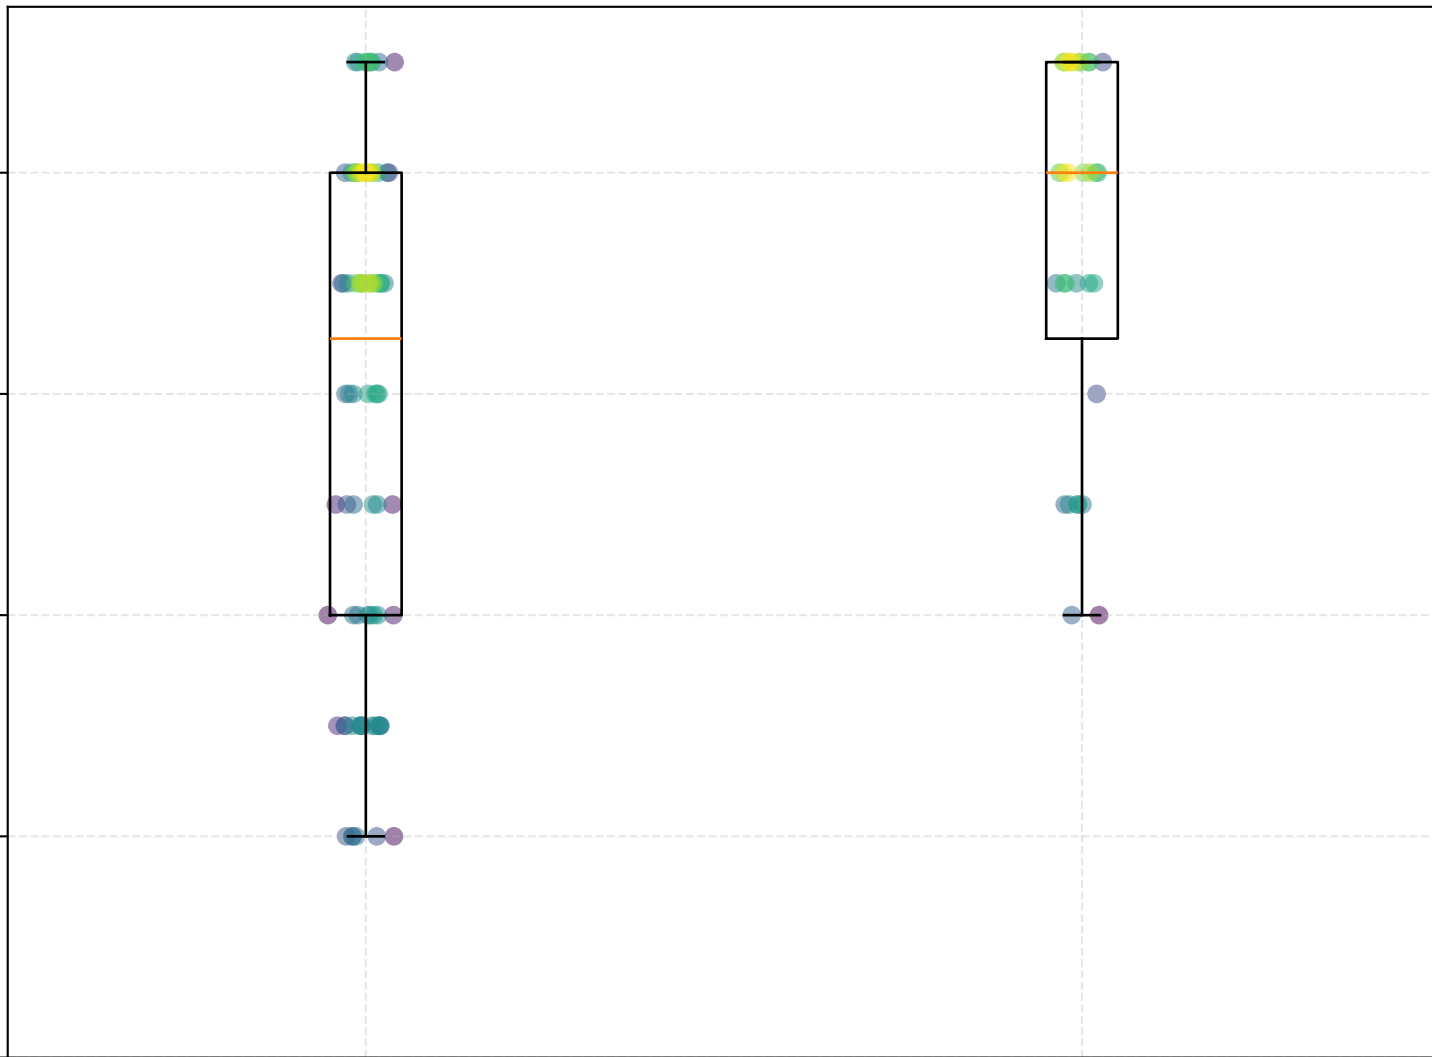

Supplement: supplementary_material [file q_repeat_temp_1.0_correctness_vs_normalized_legibility.pdf › cot_faithfulness-main/tests/q_repeat_temp_1.0_correctness_vs_normalized_legibility.pdf]
